# Supplementary material for: Suppression of CaMKIIβ Inhibits ANO1-Mediated Glioblastoma Progression
Source: PubMed Central journal article supplement (PMC7290681; doi:10.3390/cells9051079), 2020-04-26
Supplement: cells-09-01079-s001.pdf [file cells-09-01079-s001.pdf]

**A**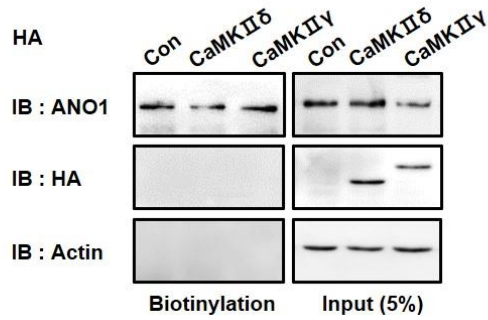**B**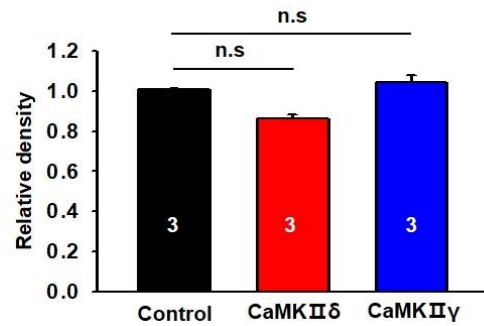

**Supplemental Figure 1.** The surface expression and activity of ANO1 is not affected by CaMKII $\delta$  and CaMKII $\gamma$  co-expression in U251 cells. (A) Cell surface biotinylation results from membrane protein fractions from U251 cells transfected with CaMKII $\delta$  or CaMKII $\gamma$ . (B) A normalized bar graph shows the summary of (A), data obtained from three independent experiments.

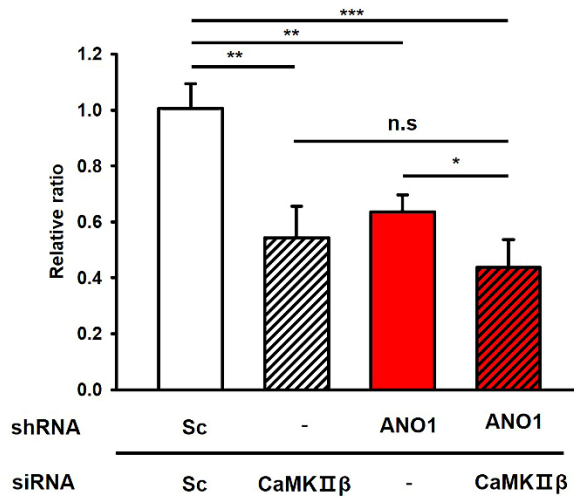

**Supplemental Figure 2.** Silencing of CaMKII $\beta$  and/or ANO1 reduced proliferation of U251 cells. Proliferation assays were performed with U251 cells infected with Lenti-ANO1shRNA and/or transfected with CaMKII $\beta$  siRNA. Normalized bar graphs showing data obtained from three independent experiments. Silencing effects of CaMKII $\beta$  or ANO1 on proliferation were compared to proliferation of the control cells treated with Lenti-Sc shRNA and Sc siRNA.
